# Supplementary material
Source: Springer Nature journal article supplement (https://www.springermedizin.de/resource/supplementary/13075_2009_2750_MOESM5_ESM.pdf/9692798)

**PsA**

**HC**

**MHCII+  
CD16+**

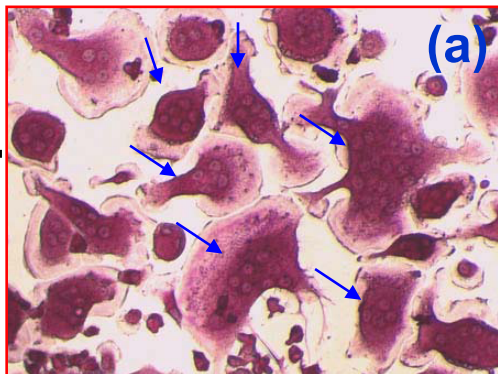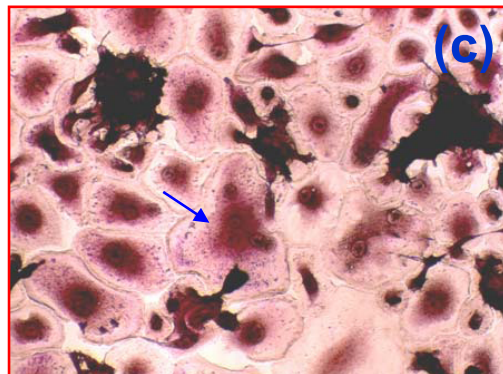

**MHCII+  
CD16-**

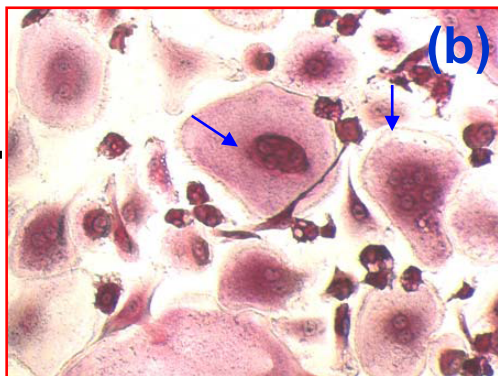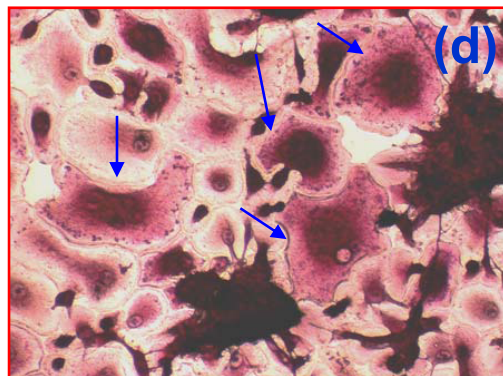

Supplement: MOESM5 [file 9692798]
